# Supplementary material
Source: PubMed Central journal article supplement (PMC3073779)
Supplement: NIHMS264680-supplement-1.pdf [file NIHMS264680-supplement-1.pdf]

# **The Essential Role of the Cu(II) State of Sco in the Maturation of the Cu<sub>A</sub> Center of Cytochrome Oxidase. Evidence from H135Met and H135SeM Variants of the *Bacillus subtilis* Sco**

**Gnana S. Siluvai<sup>1,2</sup>, Michiko Nakano<sup>1</sup>, Mary Mayfield<sup>1</sup>, and Ninian J. Blackburn<sup>1</sup>** ✉

(1) Division of Environmental and Biomolecular Systems, Oregon Health and Sciences University, 20000 NW Walker Road, Beaverton, OR 97006

(2) Present address Department of Chemistry & Biochemistry, 103 Chemistry and Biochemistry Building, PO Box 173400, Bozeman, MT 59717

✉ **Ninian J. Blackburn**

**Email:** [ninian@comcast.net](mailto:ninian@comcast.net)

## **Supplementary Material**

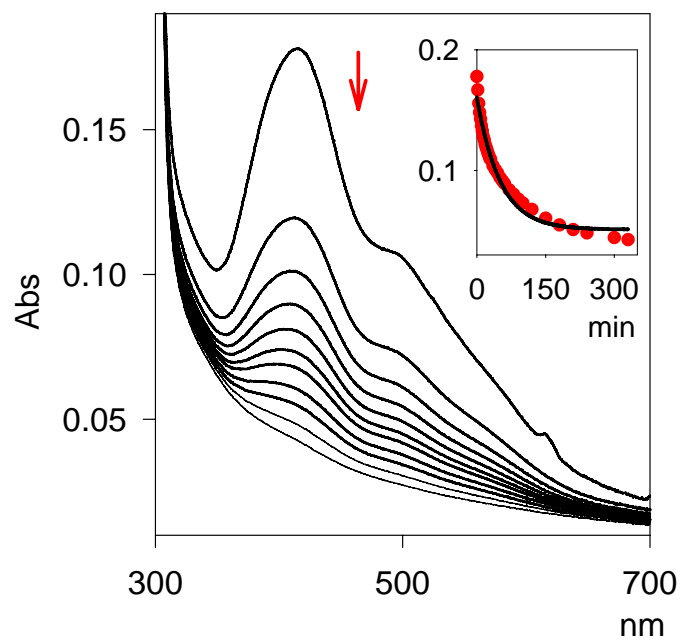

**Figure S1.** Selected kinetic traces showing the auto-reduction of Cu(II)-H135SeM ( $80 \mu\text{M}$ ) to Cu(I)-H135SeM with time. *Inset* shows the exponential nature of auto-reduction.

X-band EPR of M52/M56/H135SeM-Cu<sup>2+</sup>

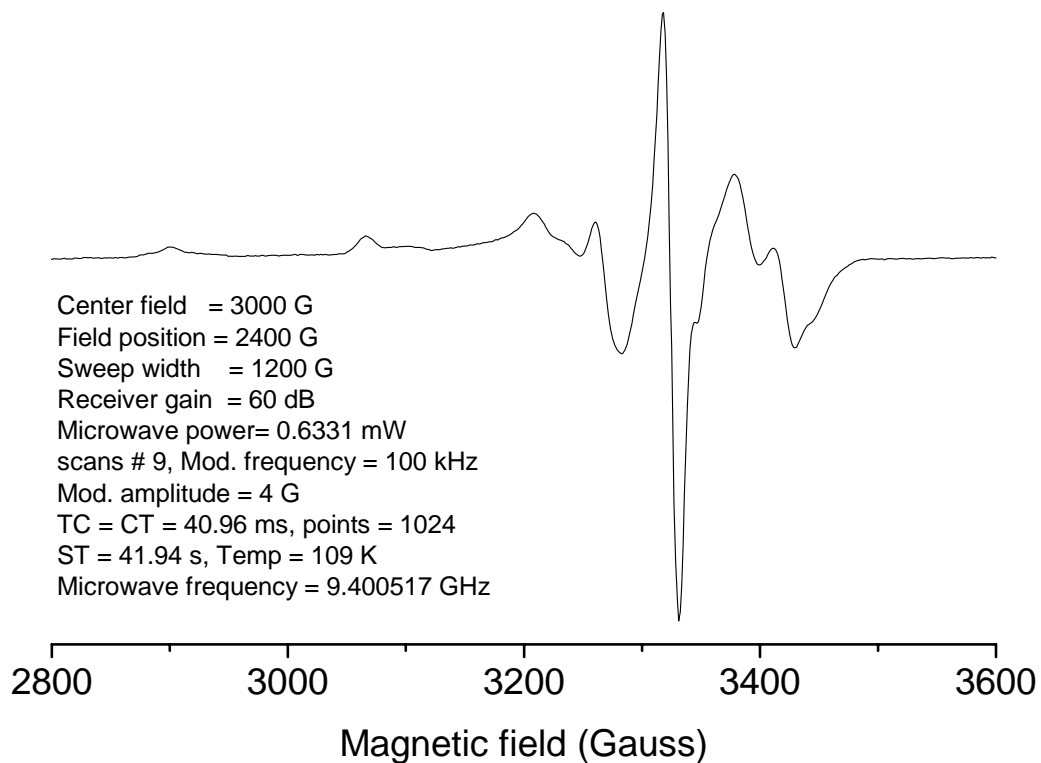

**Figure S2.** Continuous wave first-derivative X-band EPR spectra of Cu(II)-H135SeM. The experimental parameters are center field 3000 G, field position 2400 G, sweep width 1200 G, modulation amplitude 4G, modulation frequency 100 kHz, number of points 1024, receiver gain 60 dB, time constant = conversion time 40.96 ms, sweep time 41.94 s, scans 3, temperature 109 K, microwave power 0.63 mW, microwave frequency 9.4 GHz.

Table S1. Mass spectrometric data for WT, H135M and H135SeM derivatives of BSco

| Sample    | Observed Mass | Calculated Mass<br>+ N-terminal Met | Calculated Mass<br>- N-terminal Met |
|-----------|---------------|-------------------------------------|-------------------------------------|
| Wild Type | 19757         | 19766                               | 19635                               |
| H135M     | 19773         | 19762                               | 19629                               |
| H135SeM   | 19948         | 19950                               | 19770                               |

<sup>1</sup> Masses were calculated assuming a single disulfide between C45 and C49

Table S2. Association constants for WT Sco and its H135 variants. Cu(I) binding constants of BSco proteins were measured at 23°C by competitive titration against bicinchoninic acid (BCA) as described in the text. The fitting error is the statistical error derived from the simulation of each data set, and does not take into account the experimental errors associated with data collection which are generally much larger. A more realistic estimate of the error is the standard deviation of the average of  $K_{\text{Assoc}}$  which is given in Table 1 of the main text.

| Sample          | [Sco_Variant] | [Cu] | [BCA]    | $K_{\text{Assoc}}$   | Fitting Error (%) |
|-----------------|---------------|------|----------|----------------------|-------------------|
| WT              | Titrated      | 10   | 100      | $2.1 \times 10^{12}$ | 30                |
|                 | Titrated      | 10   | 200      | $5.4 \times 10^{12}$ | 11                |
|                 | Titrated      | 10   | 350      | $7.4 \times 10^{12}$ | 13                |
|                 | Titrated      | 10   | 500      | $1.7 \times 10^{13}$ | 10                |
|                 | 35            | 20   | Titrated | $2.5 \times 10^{13}$ | 15                |
| H135A           | Titrated      | 10   | 100      | $7.5 \times 10^{10}$ | 12                |
|                 | Titrated      | 20   | 100      | $5.6 \times 10^{10}$ | 36                |
|                 | 25            | 10   | Titrated | $1.1 \times 10^{11}$ | 23                |
| H135M           | Titrated      | 10   | 50       | $4.4 \times 10^{11}$ | 7                 |
|                 | Titrated      | 10   | 100      | $6.9 \times 10^{12}$ | 14                |
|                 | Titrated      | 10   | 300      | $9.0 \times 10^{12}$ | 11                |
|                 | Titrated      | 10   | 500      | $1.0 \times 10^{13}$ | 4                 |
|                 | 25            | 10   | Titrated | $3.7 \times 10^{12}$ | 10                |
| H135SeM         | Titrated      | 10   | 100      | $2.1 \times 10^{12}$ | 13                |
|                 | Titrated      | 10   | 300      | $2.1 \times 10^{12}$ | 10                |
| M52IM56IH135M   | Titrated      | 10   | 100      | $4.3 \times 10^{12}$ | 20                |
|                 | Titrated      | 10   | 300      | $1.8 \times 10^{12}$ | 4                 |
| M52IM56IH135SeM | Titrated      | 10   | 50       | $3.1 \times 10^{12}$ | 42                |
|                 |               | 10   | 100      | $2.5 \times 10^{12}$ | 30                |
